# Supplementary material
Source: publisher figshare collection journal article supplement (https://acs.figshare.com/ndownloader/files/4240264)
Supplement: Supplementary file 1 [file 4240264]

Supporting Information to:

Spatially-Resolved Sources of Dark Current from TiO<sub>2</sub> Nanoparticle Electrodes

Jesse W. Ondersma, Thomas W. Hamann\*

Department of Chemistry  
Michigan State University  
East Lansing, MI 48824-1322

\* [hamann@chemistry.msu.edu](mailto:hamann@chemistry.msu.edu)

*J-E* curves for two different electrodes, FTO coated with a TiO<sub>2</sub> blocking layer and FTO coated with a TiO<sub>2</sub> blocking layer and a nanoparticle TiO<sub>2</sub> film, were measured with the [Ru(bpy)<sub>2</sub>(MeIm)<sub>2</sub>]<sup>3+/2+</sup> and [Co(*t*-bu<sub>2</sub>bpy)<sub>3</sub>]<sup>3+/2+</sup> shuttles. The log(-*J*) vs. *E* plots are shown in figure S1. The expected behavior is a linear increase in current density as the surface area increases. Figure S1a demonstrates that there is no difference in the magnitude of dark current using the [Ru(bpy)<sub>2</sub>(MeIm)<sub>2</sub>]<sup>3+/2+</sup> redox shuttle with only a TiO<sub>2</sub> blocking layer or with a blocking layer and nanoparticle film. This result is explained by the nanoparticle film remaining largely insulating at the potentials shown, < 0 V vs. AgCl. However, with [Co(*t*-bu<sub>2</sub>bpy)<sub>3</sub>]<sup>3+/2+</sup> the dark current increases by ~ 2 orders of magnitude when the NP TiO<sub>2</sub> film is added to the blocking layer, seen clearly in figure S1b. The increase in the current density behavior is understood to result strictly from the increased surface area of the nanoparticles. The expected increase in surface area is between 2-3 orders in magnitude, slightly higher than the observed change. This is a result of mass transport limitations at higher current for the nanoparticle film electrode which can be seen as a deviation from the linearity of the log plot for the nanoparticle film.

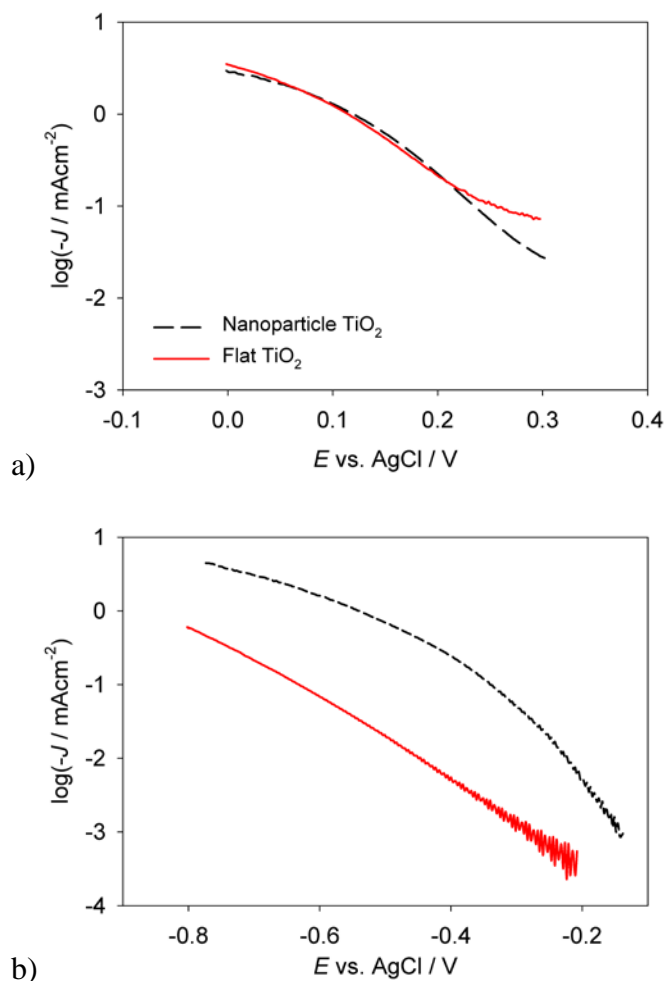

Figure S1: Log(-*J*) vs. *E* curves for electrolyte containing: a) [Ru(bpy)<sub>2</sub>(MeIm)<sub>2</sub>]<sup>3+/2+</sup> and b) [Co(*t*-bu<sub>2</sub>bpy)<sub>3</sub>]<sup>3+/2+</sup> in contact with flat TiO<sub>2</sub> (red solid) and a nanoparticle film on flat TiO<sub>2</sub> (black dashed).

CVs using TiO<sub>2</sub> resulting in multiple features have been reported previously as discussed by Bisquert *et al.* in a recent review.<sup>1</sup> These previous results, measuring the capacitive current only, did not use a redox shuttle. In order to clearly demonstrate that our results are faradaic currents and not influenced by capacitive currents, we have measured the capacitive current using a blocking electrolyte (0.1 M LiClO<sub>4</sub> in acetonitrile). Figure S2 shows the comparative currents on a log scale, clearly indicating that in the potential region of interest (-0.1 to 0.2 V vs. AgCl) the capacitive current is 2 to 3 orders of magnitude lower than our measured CVs.

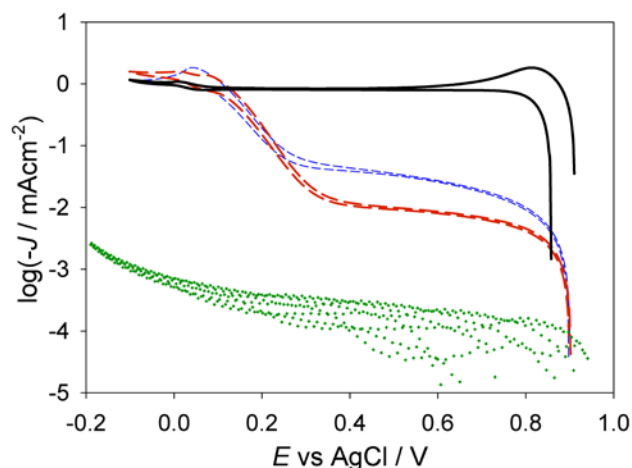

**Figure S2:** The  $\log(-J)$  of cyclic voltammograms of  $[\text{Ru}(\text{bpy})_2(\text{MeIm})_2]^{3+/2+}$  using three different working electrodes: nanoparticle TiO<sub>2</sub> on FTO (black solid), flat TiO<sub>2</sub> (blue short dash), and nanoparticle TiO<sub>2</sub> film on flat TiO<sub>2</sub> (red long dash). Also shown for reference is the capacitive CV of a nanoparticle electrode in contact with blocking electrolyte (green dot).

#### References:

- (1) Bisquert, J.; Fabregat-Santiago, F.; Mora-Sero, I.; Garcia-Belmonte, G.; Barea, E. M.; Palomares, E. *Inorg. Chem. Acta* **2008**, 361, 684.
